# Supplementary material for: SHAPE-Seq 2.0: systematic optimization and extension of high-throughput chemical probing of RNA secondary structure with next generation sequencing
Source: PubMed Central journal article supplement (PMC4245970; doi:10.1093/nar/gku909), 2014-10-10
Supplement: supp_gku909_nar-01967-met-g-2014-File007.pdf [file supp_gku909_nar-01967-met-g-2014-File007.pdf]

## Supporting Information for

# SHAPE-Seq 2.0: Systematic Optimization and Extension of High-Throughput Chemical Probing of RNA Secondary Structure with Next Generation Sequencing.

David Loughrey<sup>1</sup>, Kyle E. Watters<sup>1</sup>, Alexander H. Settle<sup>1</sup> and Julius B. Lucks<sup>1\*</sup>

1 – School of Chemical and Biomolecular Engineering, Cornell University, Ithaca NY 14850

| Table/Figure | Description                                                                                                                                                          |
|--------------|----------------------------------------------------------------------------------------------------------------------------------------------------------------------|
| Table S1     | RNA sequences used in this study.                                                                                                                                    |
| Table S2     | RNA folding buffer conditions and ligand concentrations used in replicate experiments.                                                                               |
| Figure S1    | SHAPE-CE Flowchart                                                                                                                                                   |
| Figure S2    | SHAPE-Seq v1.0 and Second Adapter Variation Library (Minimal, Inverted) Construction Schematics.                                                                     |
| Figure S3    | SHAPE-Seq v1.0 library indexing strategy.                                                                                                                            |
| Figure S4    | SHAPE-Seq v2.0 Library Construction Schematic.                                                                                                                       |
| Table S3     | List of barcoded reverse transcription primers used during the SHAPE-Seq v2.0 library generation.                                                                    |
| Figure S5    | QuSHAPE vs. SHAPE-Seq (v1.0) detailed comparisons.                                                                                                                   |
| Figure S6    | SHAPE-Seq v1.0 vs. Minimal or Inverted adapter variations for RNase P and tRNA.                                                                                      |
| Figure S7    | Time course of CirLigase I ligation efficiency.                                                                                                                      |
| Figure S8    | Ligase comparison for addition of SHAPE-Seq second adapter.                                                                                                          |
| Figure S9    | Modification and optimization of RT primer blocking groups for adapter ligation.                                                                                     |
| Figure S10   | Effect of 3' blocking group on second adapter concatemerization and ligation efficiency.                                                                             |
| Figure S11   | SHAPE-Seq v1.0 fragment distributions for different numbers of PCR cycles.                                                                                           |
| Figure S12   | SHAPE-Seq v2.0 vs. SHAPE-Seq v1.0.                                                                                                                                   |
| Figure S13   | Choice of 5' adenylated linker sequence for SHAPE-Seq 2.0 universal priming strategy.                                                                                |
| Figure S14   | SHAPE-Seq v2.0 reactivities generated from the MiSeq and HiSeq platforms.                                                                                            |
| Table S4     | RNA structure prediction accuracy using the RNAstructure <i>fold</i> algorithm with no SHAPE constraints                                                             |
| Table S5     | RNA structure prediction accuracy using SHAPE-Seq v2.0 reactivity data ( $\rho$ 's) as constraints in the RNAstructure <i>fold</i> algorithm, $m = 1.8$ , $b = -0.6$ |
| Table S6     | RNA structure prediction accuracy using SHAPE-Seq v2.0 reactivity data ( $\rho$ 's) as constraints in the RNAstructure <i>fold</i> algorithm, $m = 1.1$ , $b = -0.3$ |
| Table S7     | Data deposition table.                                                                                                                                               |

**Table S1:** RNA sequences used in this study. Sequences are listed as DNA sequence for convenient use in Spats. **Blue** lettering indicates the structure cassette sequence initially developed for SHAPE analysis using capillary electrophoresis (1), or the GG sequence required for T7 RNA polymerase *in vitro* transcription. **Green** lettering indicates an RNA-specific barcode used for multiplexing SHAPE-Seq v1.0 experiments (2, 3). **Red** lettering indicates reverse transcriptase (RT) priming site. Note that the SHAPE-Seq v2.0 uses an RT priming site that is introduced after linker ligation (Figure S4), so no explicit RT priming site is present in the RNA, although it is appended to the RNA sequence before Spats analysis.

| Name                                              | Sequence                                                                                                                                                                                                                                                           | Experiments                | Figure                                                                                                               |
|---------------------------------------------------|--------------------------------------------------------------------------------------------------------------------------------------------------------------------------------------------------------------------------------------------------------------------|----------------------------|----------------------------------------------------------------------------------------------------------------------|
| 5S rRNA, <i>E. coli</i>                           | GGCCTTCGGGCCAAATGCCTGGCGGCC<br>GTAGCGCGGTGGTCCCACCTGACCCCA<br>TGCCGAACTCAGAAGTCAAACGCCGTA<br>GCGCCGATGGTAGTGTGGGGTCTCCCC<br>ATGCGAGAGTAGGGAAGTCCAGGCAT<br>CCGATCCGCTTCGGCGGATCCAAATAAA<br>TCGGGCTTCGGTCCGGTTC                                                      | QuSHAPE,<br>SHAPE-Seq v1.0 | Figure 2,<br>Figure 3,<br>Figure 5,<br>SI Figure 5,<br>SI Figure 11,<br>SI Figure 12,<br>SI Figure 14                |
| Adenine riboswitch, <i>V. vulnificus</i>          | GGCCTTCGGGCCAAACGCTTCATATAAT<br>CCTAATGATATGTTTTGGAGTTTCTAC<br>CAAGAGCCTTAAACTCTTGATTATGAAGT<br>GCCGATCCGCTTCGGCGGATCCAAACA<br>AATCGGGCTTCGGTCCGGTTC                                                                                                               | QuSHAPE,<br>SHAPE-Seq v1.0 | Figure 2,<br>Figure 5,<br>SI Figure 5,<br>SI Figure 12                                                               |
| Cyclic di-GMP riboswitch, <i>V. cholerae</i>      | GGTGTACGCACAGGGCAAACCATTTCG<br>AAAGAGTGGGACGCAAAGCCTCCGGCC<br>TAAACCAGAAGACATGGTAGGTAGCGG<br>GGTTACCGATGGCAAATGCATACCCGA<br>TCCGCTTCGGCGGATCCAAATCGGGCTT<br>CGGTCCGGTTC                                                                                            | QuSHAPE,<br>SHAPE-Seq v1.0 | Figure 5,<br>SI Figure 12                                                                                            |
| P4-P6, <i>Tetrahymena</i> group I intron ribozyme | GGCCTTCGGGCCAAAGAATTGCGGGAAA<br>GGGGTCAACAGCCGTTTCAAGTACCAAGT<br>CTCAGGGGAAACTTTGAGATGGCCTTGC<br>AAAGGGTATGGTAATAAGCTGACGGACA<br>TGGTCCTAACACGCAGCCAAGTCCTAA<br>GTCAACAGATCTTCTGTTGATATGGATG<br>CAGTTCAAACCCCGATCCGCTTCGGCG<br>GATCCAAATAAATCGGGCTTCGGTCCGG<br>TTC | QuSHAPE,<br>SHAPE-Seq v1.0 | Figure 2,<br>Figure 5,<br>SI Figure 5,<br>SI Figure 12,<br>SI Figure 14                                              |
| RNAse P, specificity domain, <i>B. subtilis</i>   | GGTCGTGCCTAGCGAAGTCATAAGCTAG<br>GGCAGTCTTTAGAGGCTGACGGCAGGA<br>AAAAAGCCTACGTCTTCGGATATGGCTG<br>AGTATCCTTGAAAAGTGCCACAGTGACGA<br>AGTCTCACTAGAAATGGTGAGAGTGGAA<br>CGCGGTAAACCCCTCGACCCGATCCGCT<br>TCGGCGGATCCCTTGAATCGGGCTTC<br>GGTCCGGTTC                           | QuSHAPE,<br>SHAPE-Seq v1.0 | Figure 2,<br>Figure 5<br>SI Figure 5,<br>SI Figure 6,<br>SI Figure 12                                                |
| tRNA <sup>phe</sup> , <i>E. coli</i>              | GGCCTTCGGGCCAAGCGGATTTAGCTC<br>AGTTGGGAGAGCGCCAGACTGAAGATC<br>TGGAGGTCCTGTGTTTCGATCCACAGAAT<br>TCGCACCAACCGATCCGCTTCGGCGGAT<br>CCAAAGAAATCGGGCTTCGGTCCGGTTC                                                                                                        | QuSHAPE,<br>SHAPE-Seq v1.0 | Figure 2,<br>Figure 3,<br>Figure 5,<br>SI Figure 5<br>SI Figure 6,<br>SI Figure 11,<br>SI Figure 12,<br>SI Figure 14 |
| Hepatitis C virus IRES domain                     | GGCCTTCGGGCCAACCATGAATCACTCC<br>CCTGTGAGGAACTACTGTCTTCACGCAG<br>AAAGCGTCTAGCCATGGCGTTAGTATGA                                                                                                                                                                       | QuSHAPE,<br>SHAPE-Seq v1.0 | Figure 5,<br>SI Figure 12                                                                                            |

|                                                            |                                                                                                                                                                                                                                                                                                                                                                   |                            |                           |
|------------------------------------------------------------|-------------------------------------------------------------------------------------------------------------------------------------------------------------------------------------------------------------------------------------------------------------------------------------------------------------------------------------------------------------------|----------------------------|---------------------------|
|                                                            | GTGTCGTGCAGCCTCCAGGACCCCCC<br>TCCCGGGAGAGCCATAGTGGTCTGCGG<br>AACCGGTGAGTACACCGGAATTGCCAG<br>GACGACCGGGTCCTTTCTTGATTAACC<br>CGCTCAATGCCTGGAGATTTGGGCGTG<br>CCCCGCGAGACTGCTAGCCGAGTAGT<br>GTTGGGTCGCGAAAGGCCTTGTGGTAC<br>TGCCTGATAGGGTGCTTGCGAGTGCCC<br>CGGGAGGTCTCGTAGACCGTGCATCAT<br>GAGCACGAATCCTAAACCTCAACCGATC<br>CGCTTCGGCGGATCCAGCAAATCGGG<br>CTTCGGTCCGGTTC |                            |                           |
| SAM I<br>riboswitch, <i>T.<br/>tencongensis</i>            | GGCCTTCGGGCCAATTCTTATCAAGAGA<br>AGCAGAGGGACTGGCCCCGACGAAGCTT<br>CAGCAACCGGTGTAATGGCGATCAGCC<br>ATGACCAAGGTGCTAAATCCAGCAAGCT<br>CGAACAGCTTGAAGATAAGAACCGATC<br>CGCTTCGGCGGATCCAAACCAAATCGGG<br>CTTCGGTCCGGTTC                                                                                                                                                      | QuSHAPE,<br>SHAPE-Seq v1.0 | Figure 5,<br>SI Figure 12 |
| TPP<br>riboswitch, <i>E.<br/>coli</i>                      | GGCCTTCGGGCCAAGACTCGGGGTGCC<br>CTTCTGCGTGAAGGCTGAGAAATACCCG<br>TATCACCTGATCTGGATAATGCCAGCGT<br>AGGGAAGTTCGGATCCGTTTCGGCGG<br>ATCCATAAAATCGGGCTTCGGTCCGGT<br>TC                                                                                                                                                                                                    | QuSHAPE,<br>SHAPE-Seq v1.0 | Figure 5,<br>SI Figure 12 |
| 5S rRNA, <i>E.<br/>coli</i>                                | GGATGCCTGGCGGCCGTAGCGCGGTG<br>GTCCACCTGACCCCATGCCGAAGTCA<br>GAAGTGAACGCCGTAGCGCCGATGGT<br>AGTGTGGGGTCTCCCCATGCGAGAGTA<br>GGAACTGCCAGGCAT                                                                                                                                                                                                                          | SHAPE-Seq v2.0             | Figure 5,<br>SI Figure 12 |
| Adenine<br>Riboswitch,<br><i>V. vulnificus</i>             | GGACGCTTCATATAATCCTAATGATATG<br>GTTTGGGAGTTTCTACCAAGAGCCTTAA<br>ACTCTTGATTATGAAGTG                                                                                                                                                                                                                                                                                | SHAPE-Seq v2.0             | Figure 5,<br>SI Figure 12 |
| Cyclic di-<br>GMP<br>riboswitch, <i>V.<br/>cholerae</i>    | GGTGTACGCGACAGGGCAAACCATTTCG<br>AAAGAGTGGGACGCAAAGCCTCCGGCC<br>TAAACCAGAAGACATGGTAGGTAGCGG<br>GGTTACCGATGGCAAATGCATAC                                                                                                                                                                                                                                             | SHAPE-Seq v2.0             | Figure 5,<br>SI Figure 12 |
| P4-P6,<br><i>Tetrahymena</i><br>group I intron<br>ribozyme | GGAATTGCGGGAAAGGGTCAACAGCC<br>GTTTACAGTACCAAGTCTCAGGGAAACTT<br>TGAGATGGCCTTGCAAAGGGTATGGTAA<br>TAAGCTGACGGACATGGTCCCTAACCACG<br>CAGCCAAGTCCCTAAGTCAACAGATCTTC<br>TGTTGATATGGATGCAGTTCAAACC                                                                                                                                                                        | SHAPE-Seq v2.0             | Figure 5,<br>SI Figure 12 |
| RNAse P,<br>specificity<br>domain, <i>B.<br/>subtilis</i>  | GGTCGTGCCTAGCGAAGTCATAAGCTAG<br>GGCAGTCTTTAGAGGCTGACGGCAGGA<br>AAAAAGCCTACGTCTTCGGATATGGCTG<br>AGTATCCTTGAAAAGTGCCACAGTGACGA<br>AGTCTCACTAGAAATGGTGAAGTGGAA<br>CGCGGTAACCCCTCGA                                                                                                                                                                                   | SHAPE-Seq v2.0             | Figure 5,<br>SI Figure 12 |
| tRNA <sup>phe</sup> , <i>E.<br/>coli</i>                   | GGCGGATTTAGCTCAGTTGGGAGAGCG<br>CCAGACTGAAGATCTGGAGGTCCTGTGT<br>TCGATCCACAGAATTCGCACCA                                                                                                                                                                                                                                                                             | SHAPE-Seq v2.0             | Figure 5,<br>SI Figure 12 |
| Hepatitis C<br>virus IRES<br>domain                        | GGCCATGAATCACTCCCCTGTGAGGAAC<br>TACTGTCTTACGCGAGAAAGCGTCTAGC<br>CATGGCGTTAGTATGAGTGTGCTGCAGC                                                                                                                                                                                                                                                                      | SHAPE-Seq v2.0             | Figure 5,<br>SI Figure 12 |

|                                                 |                                                                                                                                                                                                                                                                                                 |                |                           |
|-------------------------------------------------|-------------------------------------------------------------------------------------------------------------------------------------------------------------------------------------------------------------------------------------------------------------------------------------------------|----------------|---------------------------|
|                                                 | CTCCAGGACCCCCCTCCCGGGAGAGC<br>CATAGTGGTCTGCGGAACCGGTGAGTA<br>CACCGGAATTGCCAGGACGACCGGGTC<br>CTTTCTTGGATTAACCCGCTCAATGCCT<br>GGAGATTTGGGCGTGCCCCGCGAGAC<br>TGCTAGCCGAGTAGTGTGGGTCGCGA<br>AAGGCCTTGTGGTACTGCCTGATAGGGT<br>GCTTGCGAGTGCCCCGGGAGGTCTCGT<br>AGACCGTGCATCATGAGCACGAATCCTA<br>AACCTCAA |                |                           |
| SAM I<br>riboswitch, <i>T.<br/>tencongensis</i> | GGTTCTTATCAAGAGAAGCAGAGGGACT<br>GGCCCGACGAAGCTTCAGCAACCGGTG<br>TAATGGCGATCAGCCATGACCAAGGTGC<br>TAAATCCAGCAAGCTCGAACAGCTTGGA<br>AGATAAGAA                                                                                                                                                        | SHAPE-Seq v2.0 | Figure 5,<br>SI Figure 12 |
| TPP<br>riboswitch, <i>E.<br/>coli</i>           | GGACTCGGGGTGCCCTTCTGCGTGAAG<br>GCTGAGAAATACCCGTATCACCTGATCT<br>GGATAATGCCAGCGTAGGGAAGTTC                                                                                                                                                                                                        | SHAPE-Seq v2.0 | Figure 5,<br>SI Figure 12 |

**Table S2. RNA folding buffer conditions and ligand concentrations used in replicate experiments.**

| RNA                                               | Buffer / Ligand                                                                   | Reference |
|---------------------------------------------------|-----------------------------------------------------------------------------------|-----------|
| 5S rRNA, <i>E. coli</i>                           | 10 mM MgCl <sub>2</sub> , 100 mM NaCl and 100 mM HEPES (pH 8.0)                   | (4)       |
| Adenine riboswitch, <i>V. vulnificus</i>          | 10 mM MgCl <sub>2</sub> , 100 mM NaCl and 100 mM HEPES (pH 8.0), 5 $\mu$ M Ligand | (4)       |
| Cyclic di-GMP riboswitch, <i>V. cholerae</i>      | 10 mM MgCl <sub>2</sub> , 100 mM NaCl and 100 mM HEPES (pH 8.0), 5 $\mu$ M Ligand | (4)       |
| P4-P6, <i>Tetrahymena</i> group I intron ribozyme | 10 mM MgCl <sub>2</sub> , 100 mM NaCl and 100 mM HEPES (pH 8.0)                   | (4)       |
| RNAse P, specificity domain, <i>B. subtilis</i>   | 10 mM MgCl <sub>2</sub> , 100 mM NaCl and 100 mM HEPES (pH 8.0)                   | (2)       |
| tRNA <sup>phe</sup> , <i>E. coli</i>              | 10 mM MgCl <sub>2</sub> , 100 mM NaCl and 100 mM HEPES (pH 8.0)                   | (4)       |
| Hepatitis C virus IRES domain                     | 10 mM MgCl <sub>2</sub> , 100 mM NaCl and 100 mM HEPES (pH 8.0)                   | (5)       |
| SAM I riboswitch, <i>T. tencongensis</i>          | 10 mM MgCl <sub>2</sub> , 100 mM NaCl and 100 mM HEPES (pH 8.0), 5 $\mu$ M Ligand | (5)       |
| TPP riboswitch, <i>E. coli</i>                    | 10 mM MgCl <sub>2</sub> , 100 mM NaCl and 100 mM HEPES (pH 8.0), 5 $\mu$ M Ligand | (5)       |

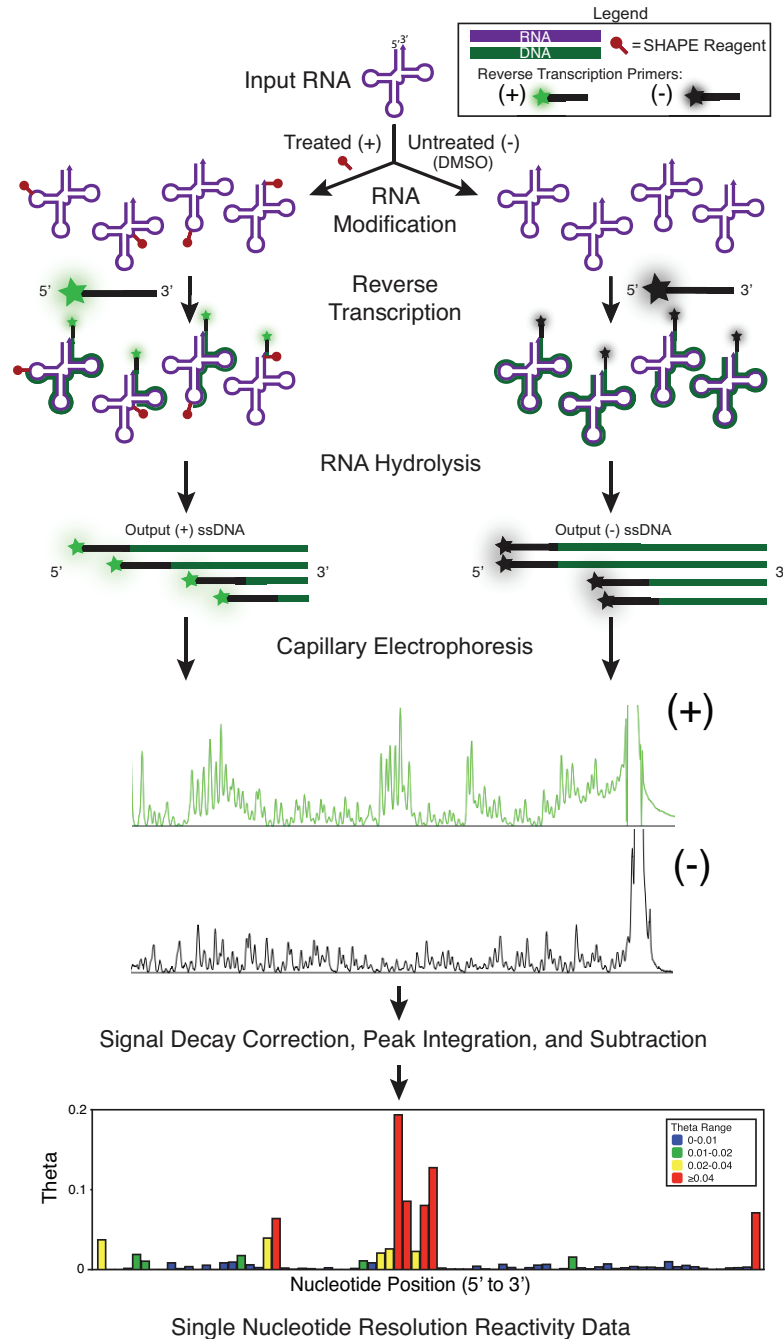

**Figure S1. SHAPE-CE Flowchart.** Like SHAPE-Seq, SHAPE-CE begins by modifying RNAs with a SHAPE reagent such as 1M7 (1). However, unlike SHAPE-Seq, reverse transcription (RT) is performed with fluorescent primers to create a pool of cDNAs (whose length distribution reflects the distribution of modification positions, like SHAPE-Seq). Two different fluorophores distinguish the modified and control reactions, which are detected with capillary electrophoresis (CE). The resulting CE traces are manually integrated and subtracted to obtain a reactivity spectrum for an RNA. An example with *E. coli* tRNA<sup>phe</sup> is shown. Not shown are additional di-deoxy-terminated sequencing reactions that are used to align CE peaks to the RNA sequence.

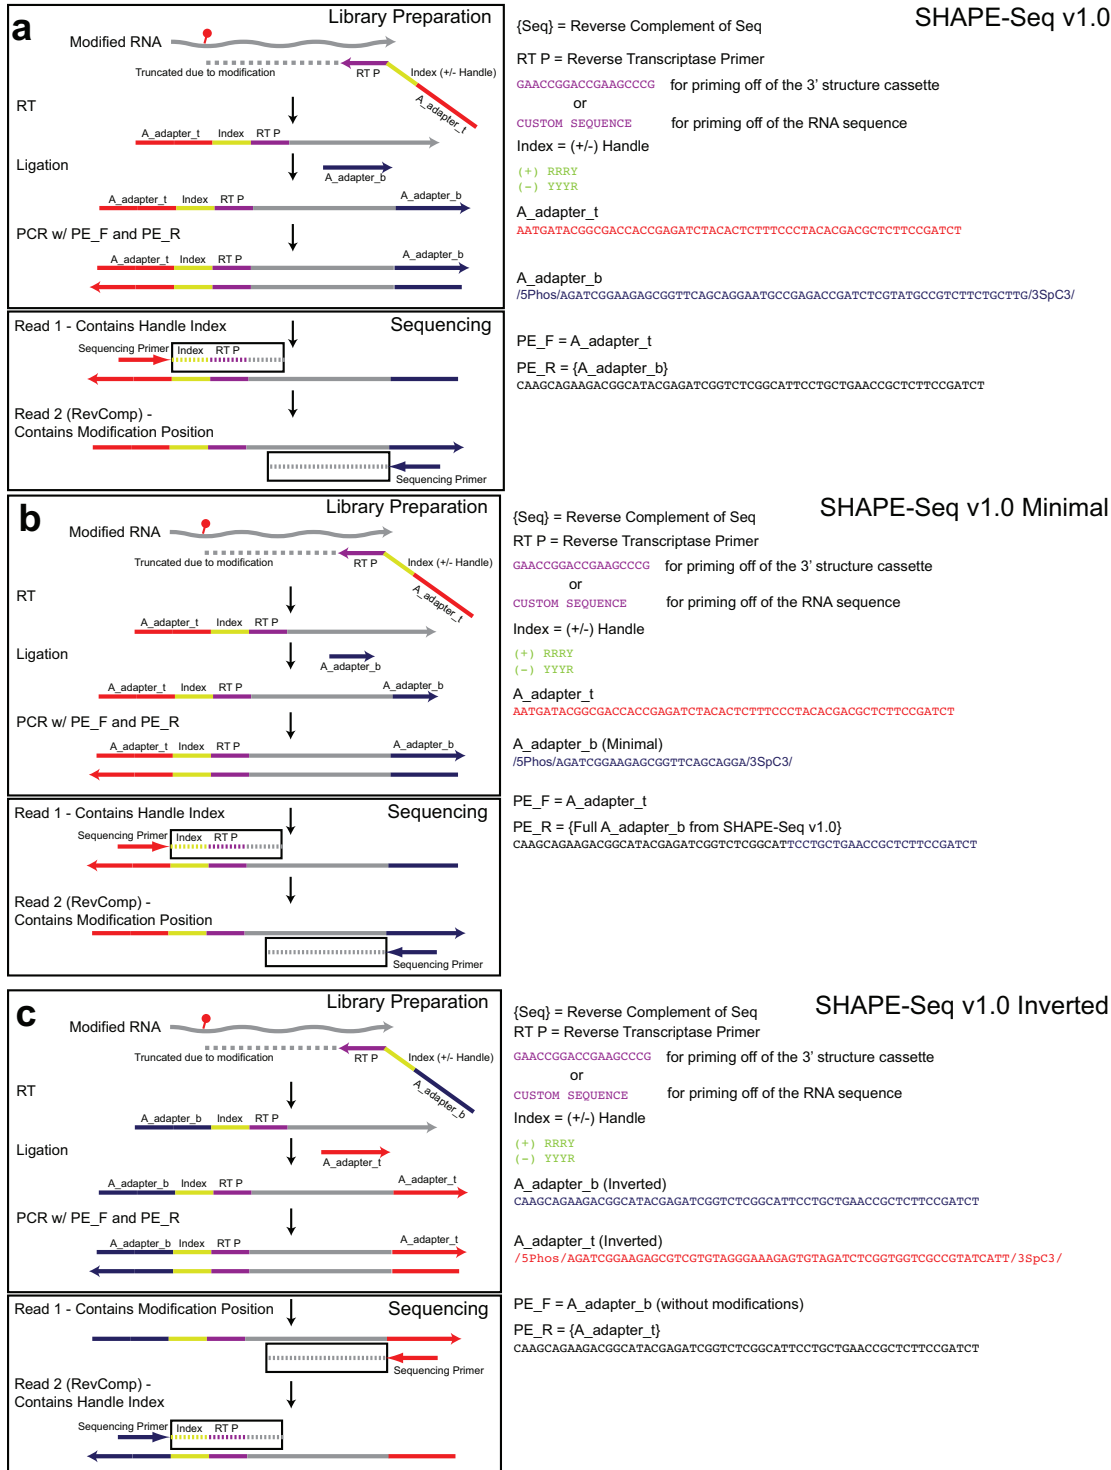

**Figure S2. SHAPE-Seq v1.0 and Second Adapter Variation Library Construction Schematics.** The left hand side shows adapter and primer orientations for library preparation (top), and which pieces of information are obtained from the library during the sequencing process (bottom), for (a) SHAPE-Seq v1.0, (b) the 'Minimal' adapter configuration, and (c) the 'Inverted' adapter configuration. The right hand side shows DNA sequences of primers and adapters (5' to 3' orientation), color-coded to match the schematic.

## SHAPE-Seq v1.0 Indexed

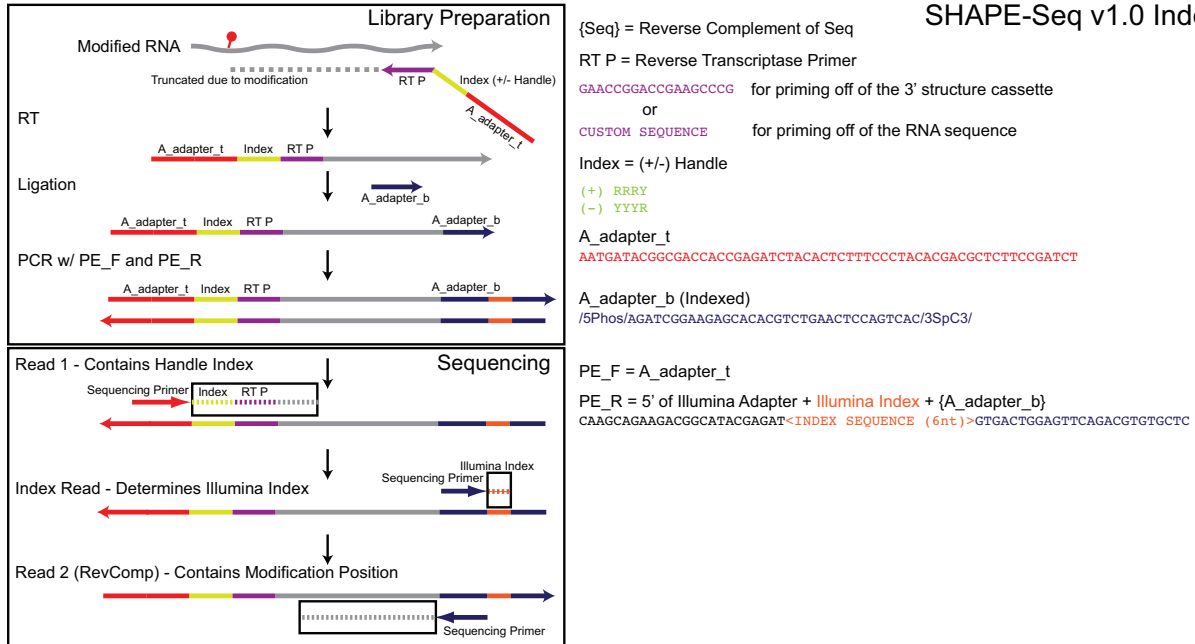

**Figure S3. SHAPE-Seq v1.0 library indexing strategy.** The left hand side shows adapter and primer orientations for library preparation (top), and which pieces of information are obtained from the library during the sequencing process (bottom) for the SHAPE-Seq v1.0 Indexed library preparation strategy (compare to Figure S2A). The difference between SHAPE-Seq v1.0 and SHAPE-Seq v1.0 Indexed is the presence of Illumina indexing sequences that are added during PCR and sequenced separately during the Index Read. This allows multiple SHAPE-Seq libraries to be sequenced in the same lane following standard Illumina indexing strategies. The right hand side shows DNA sequences of primers and adapters (5' to 3' orientation), color-coded to match the schematic.



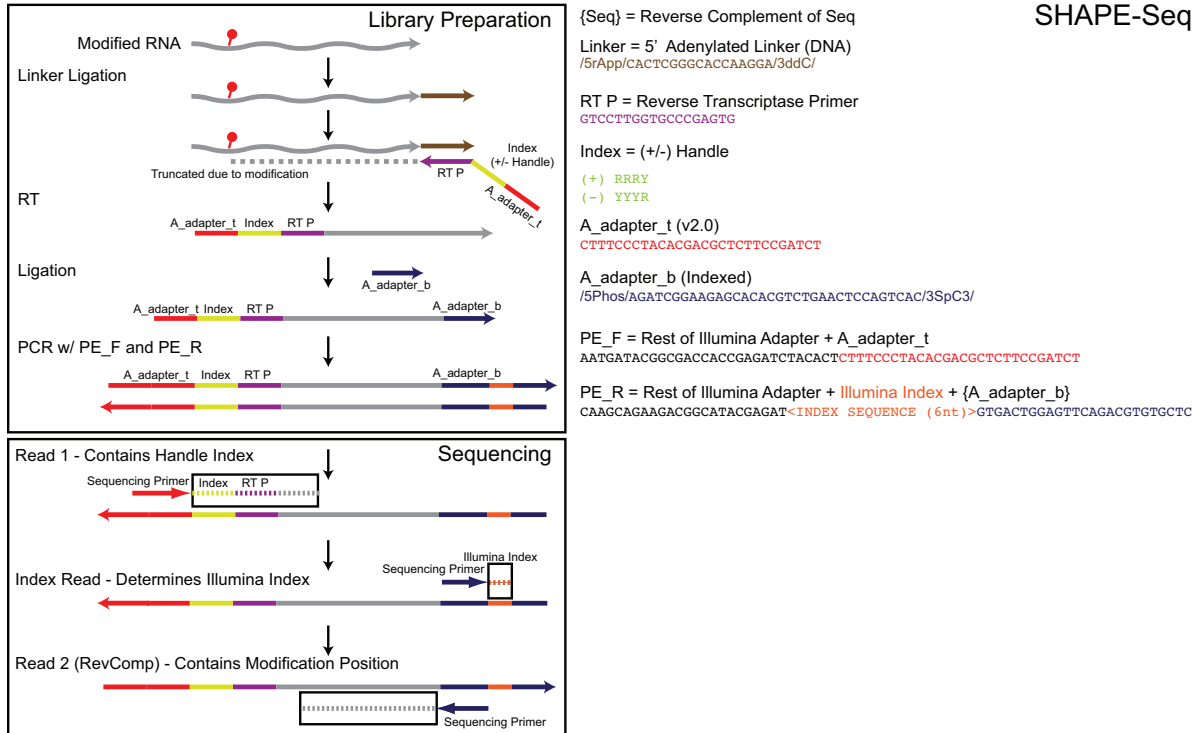

**Figure S4. SHAPE-Seq v2.0 Library Construction Schematic.** The left hand side shows adapter and primer orientations for library preparation (top), and which pieces of information are obtained from the library during the sequencing process (bottom) for the Indexed library preparation strategy. The right hand side shows DNA sequences of primers and adapters (5' to 3' orientation), color-coded to match the schematic. SHAPE-Seq v2.0 uses a 'universal' RT priming strategy as well as the standard Illumina library indexing strategy.

**Table S3. List of barcoded reverse transcription primers used during the SHAPE-Seq v2.0 library generation.** Illumina adapter sequences are in black, the (+/-) handles are in green, internal barcodes are in red, and the RT priming sites are in purple. Illumina TruSeq indexes can be found at:

[http://supportres.illumina.com/documents/myillumina/6378de81-c0cc-47d0-9281-724878bb1c30/2012-09-18\\_illuminacustomersequenceletter.pdf](http://supportres.illumina.com/documents/myillumina/6378de81-c0cc-47d0-9281-724878bb1c30/2012-09-18_illuminacustomersequenceletter.pdf)

| RNA                                               | RT Primer Sequences                                                                                                                | Illumina Index# (TruSeq) |
|---------------------------------------------------|------------------------------------------------------------------------------------------------------------------------------------|--------------------------|
| tRNA <sup>phe</sup>                               | /5Biosg/CTTTCCTACACGACGCTCTTCCGAT<br>CTYYYRgtccttggtgcccgagtg<br>/5Biosg/CTTTCCTACACGACGCTCTTCCGAT<br>CTRRRYgtccttggtgcccgagtg     | 1,2,3                    |
| Adenine riboswitch, <i>V. vulnificus</i>          | /5Biosg/CTTTCCTACACGACGCTCTTCCGAT<br>CTYYYRgtccttggtgcccgagtg<br>/5Biosg/CTTTCCTACACGACGCTCTTCCGAT<br>CTRRRYgtccttggtgcccgagtg     | 4,5,6                    |
| 5S rRNA, <i>E. coli</i>                           | /5Biosg/CTTTCCTACACGACGCTCTTCCGAT<br>CTYYYRgtccttggtgcccgagtg<br>/5Biosg/CTTTCCTACACGACGCTCTTCCGAT<br>CTRRRYgtccttggtgcccgagtg     | 1,2,3                    |
| P4-P6, <i>Tetrahymena</i> group I intron ribozyme | /5Biosg/CTTTCCTACACGACGCTCTTCCGAT<br>CTYYYRCCgtccttggtgcccgagtg<br>/5Biosg/CTTTCCTACACGACGCTCTTCCGAT<br>CTRRRYCCgtccttggtgcccgagtg | 1,2,3                    |
| RNAse P, specificity domain, <i>B. subtilis</i>   | /5Biosg/CTTTCCTACACGACGCTCTTCCGAT<br>CTYYYRAgccttggtgcccgagtg<br>/5Biosg/CTTTCCTACACGACGCTCTTCCGAT<br>CTRRRYAgccttggtgcccgagtg     | 4,5,6                    |
| TPP riboswitch, <i>E. coli</i>                    | /5Biosg/CTTTCCTACACGACGCTCTTCCGAT<br>CTYYYRAgccttggtgcccgagtg<br>/5Biosg/CTTTCCTACACGACGCTCTTCCGAT<br>CTRRRYAgccttggtgcccgagtg     | 4,5,6                    |
| SAM I riboswitch, <i>T. tencongensis</i>          | /5Biosg/CTTTCCTACACGACGCTCTTCCGAT<br>CTYYYRAgccttggtgcccgagtg<br>/5Biosg/CTTTCCTACACGACGCTCTTCCGAT<br>CTRRRYAgccttggtgcccgagtg     | 10,11,12                 |
| Cyclic di-GMP riboswitch, <i>V. cholerae</i>      | /5Biosg/CTTTCCTACACGACGCTCTTCCGAT<br>CTYYYRCCgtccttggtgcccgagtg<br>/5Biosg/CTTTCCTACACGACGCTCTTCCGAT<br>CTRRRYCCgtccttggtgcccgagtg | 7,8,9                    |
| Hepatitis C virus IRES domain                     | /5Biosg/CTTTCCTACACGACGCTCTTCCGAT<br>CTYYYRCCgtccttggtgcccgagtg<br>/5Biosg/CTTTCCTACACGACGCTCTTCCGAT<br>CTRRRYCCgtccttggtgcccgagtg | 10,11,12                 |

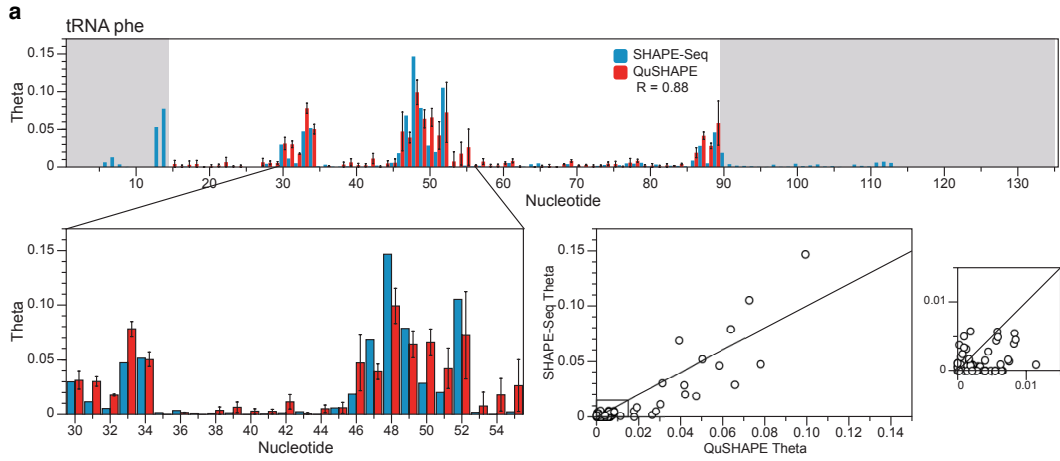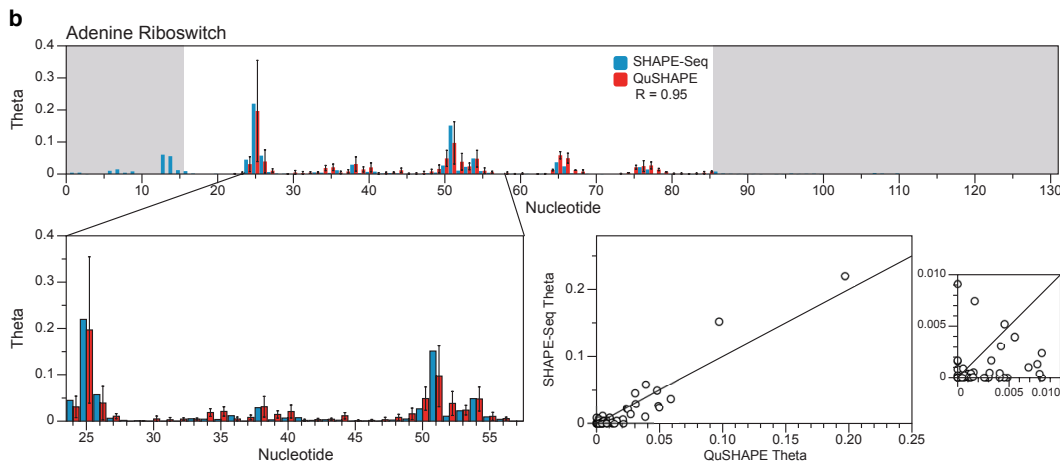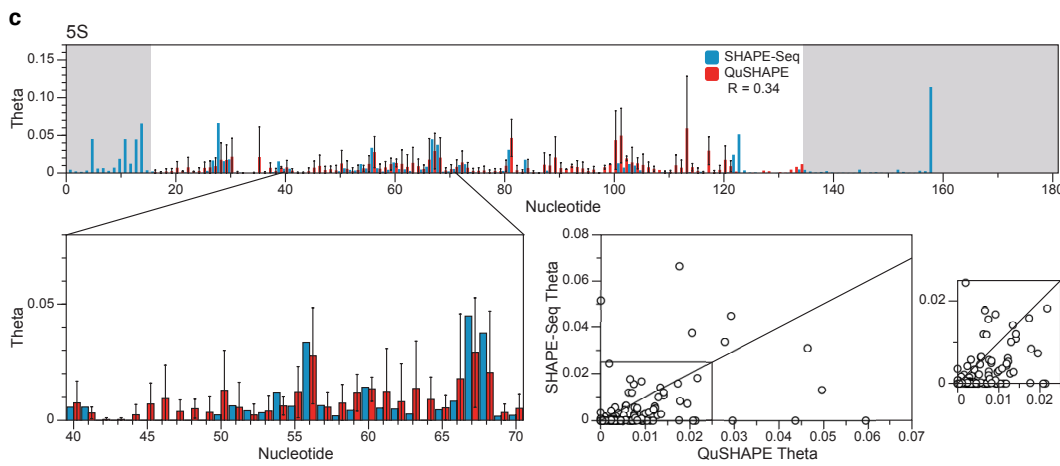

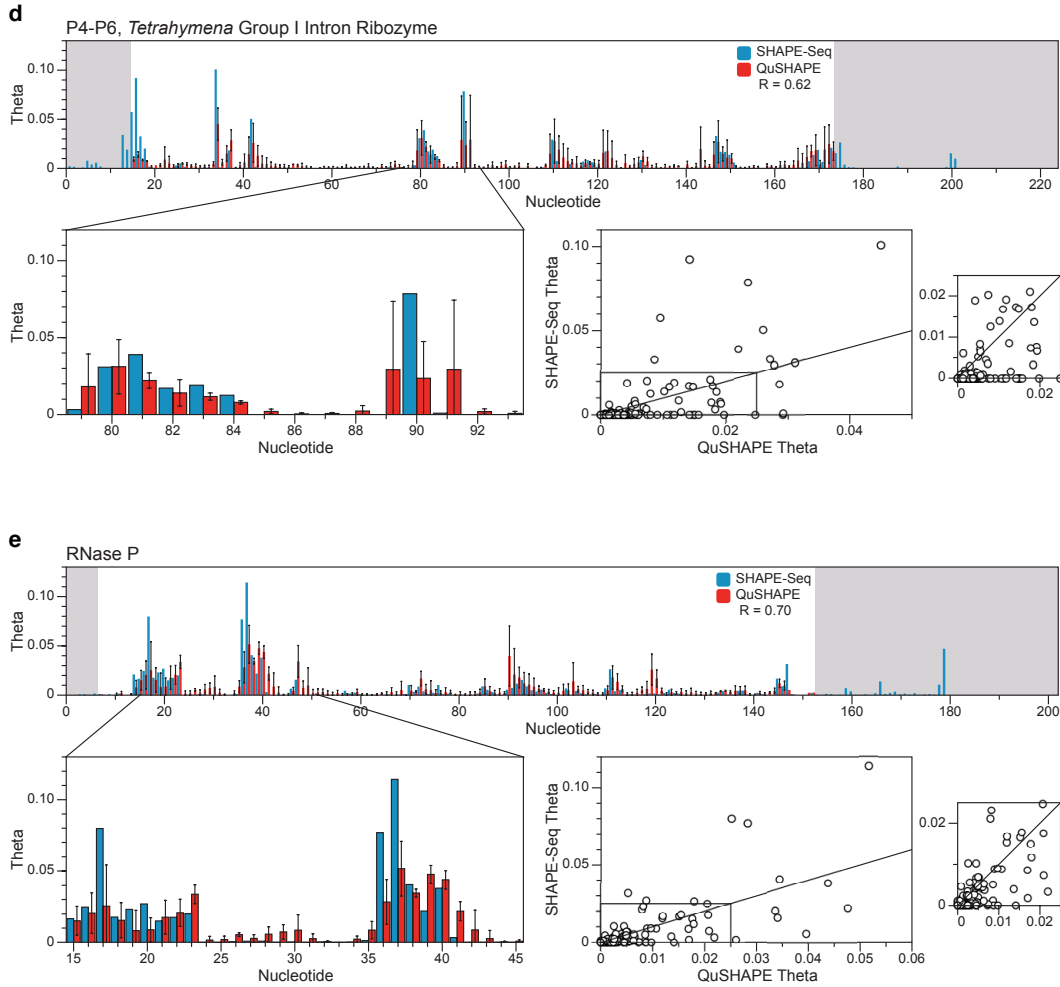

**Figure S5. QuSHAPE vs. SHAPE-Seq (v1.0) detailed comparisons.** For each RNA, SHAPE-Seq and QuSHAPE  $\theta$ 's are plotted on top, with a zoomed window on portions of the comparison shown on the bottom left. The bottom right shows SHAPE-Seq vs. QuSHAPE  $\theta$ 's plotted as a scatter plot, from which the Pearson's correlation ( $R$ ) between the two techniques is calculated. Gray boxes represent regions for which no QuSHAPE data is available. Due to difficulties encountered in the alignment step of the QuSHAPE data analysis pipeline, we often found that a single QuSHAPE experiment yielded only a fraction of the reactivities for an individual RNA. To remedy this, we performed replicate QuSHAPE experiments for each RNA, and calculated the average and standard deviation of the QuSHAPE reactivities for each nucleotide position. These QuSHAPE reactivities were then converted to QuSHAPE  $\theta$ 's by dividing by a normalization factor so that they summed to 1 over the range of nucleotides for which reactivity data was obtained. Overall, there was a strong degree of correlation between the two methods for each of the RNAs. Specifically, the Pearson correlations between  $\theta$ 's for each RNA were: 0.88 (tRNA<sup>phe</sup>), 0.70 (RNase P), 0.62 (ribozyme) and 0.95 (adenine riboswitch aptamer). Only the historically difficult 5S rRNA had a poor correlation (0.34).

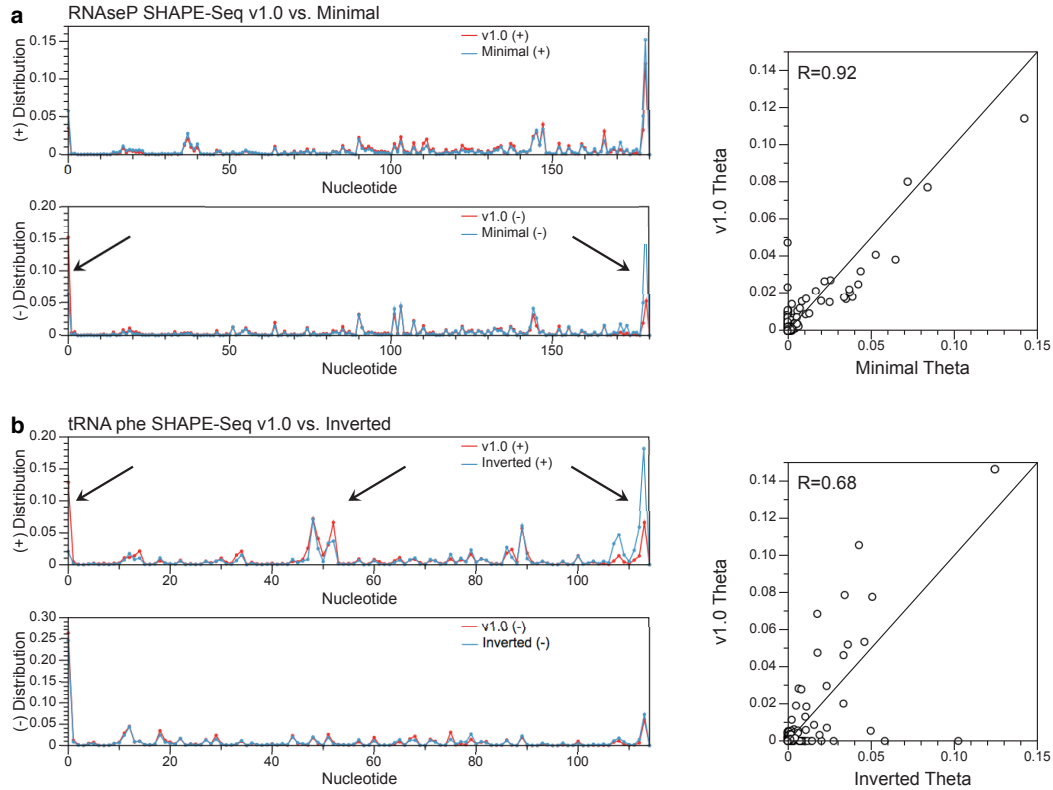

**Figure S6. SHAPE-Seq v1.0 vs. Minimal or Inverted adapter variations for RNase P and tRNA.** (+) and (-) fragment distributions are plotted for (a) v1.0 vs. Minimal for RNase P, and for (b) v1.0 vs. Inverted for tRNA. Pearson correlation values for these comparisons are summarized in Figure 2. Arrows denote specific places of discrepancy discussed in the text. Scatter plots show  $\theta$  value comparisons between the two libraries for the RNAs with Pearson correlation values shown in the plots.

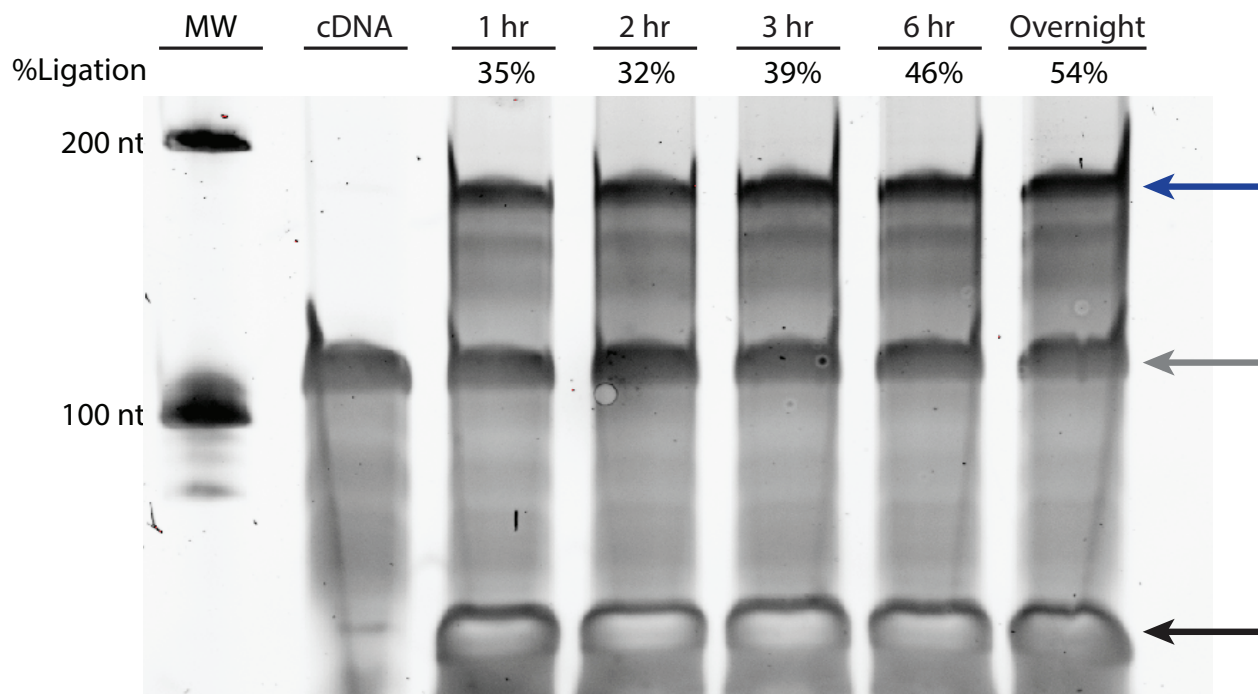

**Figure S7. Time course of CirLigase I ligation efficiency.** A 126 nt cDNA (gray arrow) was ligated to the 61nt SHAPE-Seq v1.0 Illumina adapter (Figure S1, black arrow) for one, two, three, or six hours or overnight at 68 °C to generate a 187 nt ligation product (blue arrow). Slight ligation improvement is observable over time by integration of the disappearance of the primer band. Note, however, that the gel is stained with SYBR and only provides general trends and is not absolutely quantitative. Ligation was halted after 2 hrs because the improvement gained by further incubation was less important relative to the increase in protocol time.

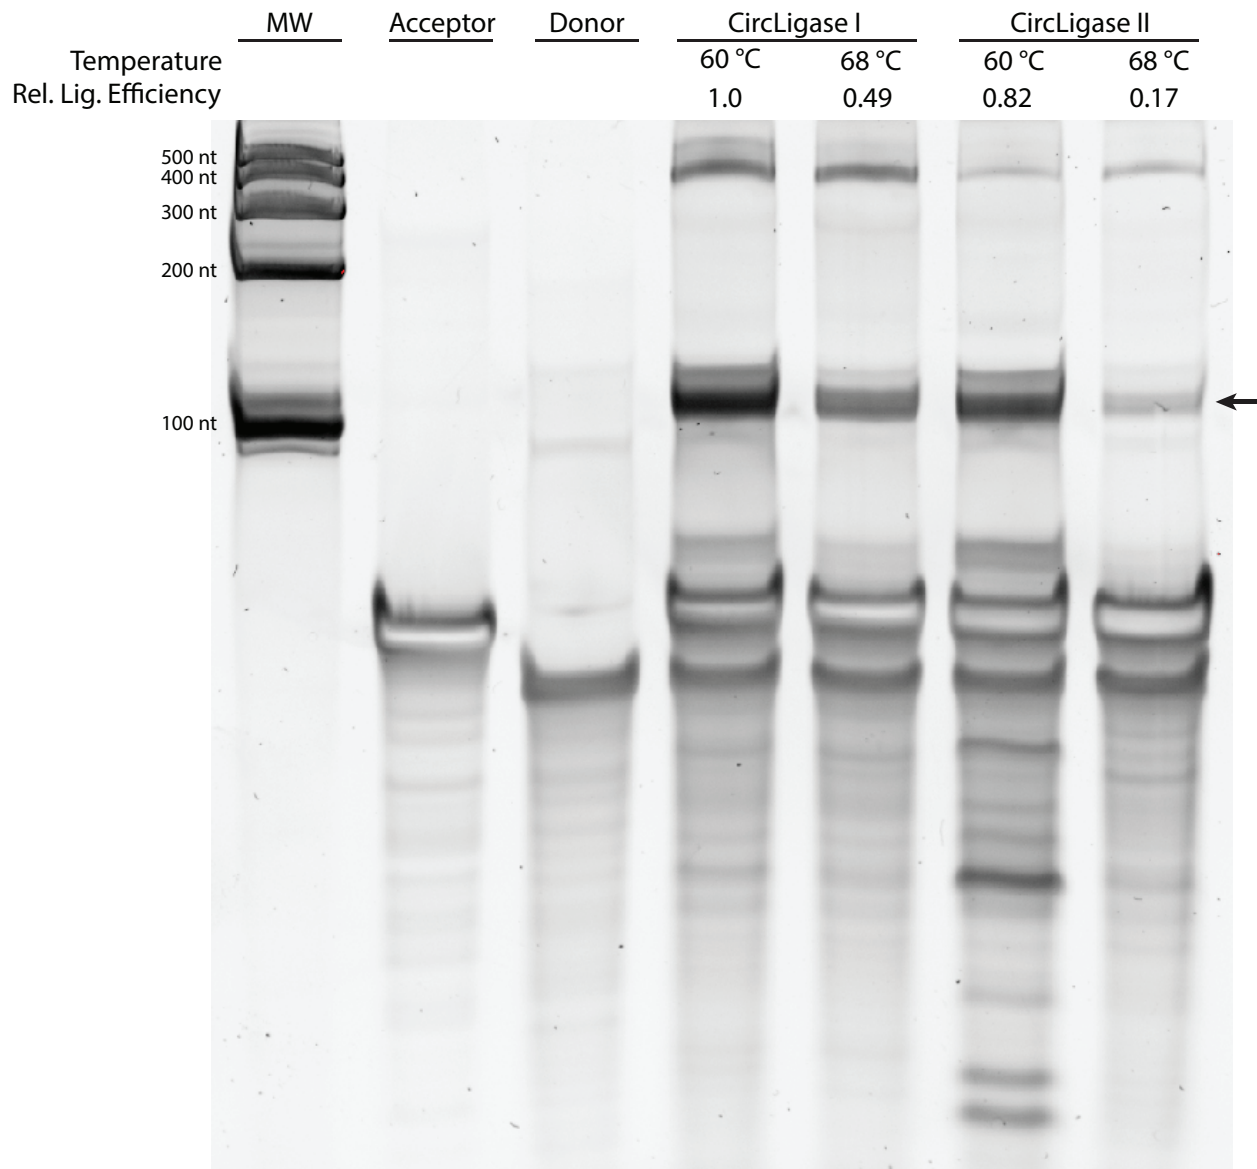

**Figure S8. Ligase comparison for addition of SHAPE-Seq second adapter.** CirLigase I and CirLigase II (Epicentre) were used to ligate the 50 nt RT primer (donor) to the 61 nt Illumina adapter (acceptor) at both 68 °C and 60 °C (manufacturer's suggestion) for two hours. The expected ligation product is denoted by the black arrow (101 nt). We found the optimum ligation condition to be CirLigase I at 60 °C for two hours by determining the relative intensity of the ligated product band. Note, however, that the gel is stained with SYBR gold and is not absolutely quantitative.

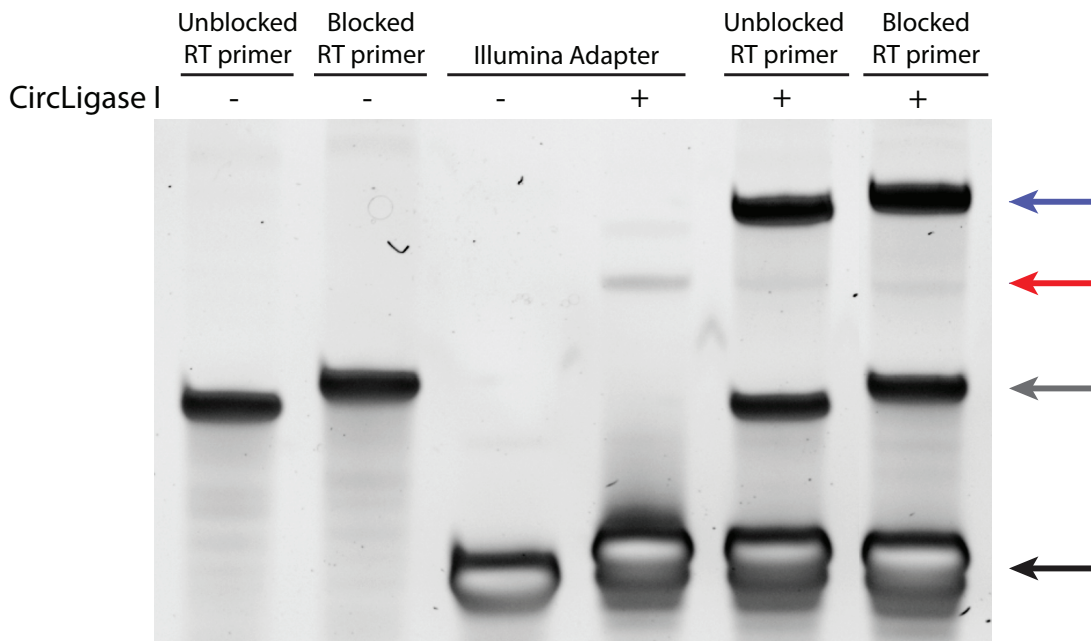

**Figure S9. Modification and optimization of RT primer blocking groups for adapter ligation.** Comparison of effect of blocking groups on the possible formation of RT primer concatemers. The top (blue) arrow shows the successfully ligated RT primer (gray arrow) + adapter (black arrow) (60 °C for 2 hours with CirLigase I). The red arrow marks the location of adapter dimer formation (studied further below in Figure S9). No bands corresponding to RT primer concatemers were observed.



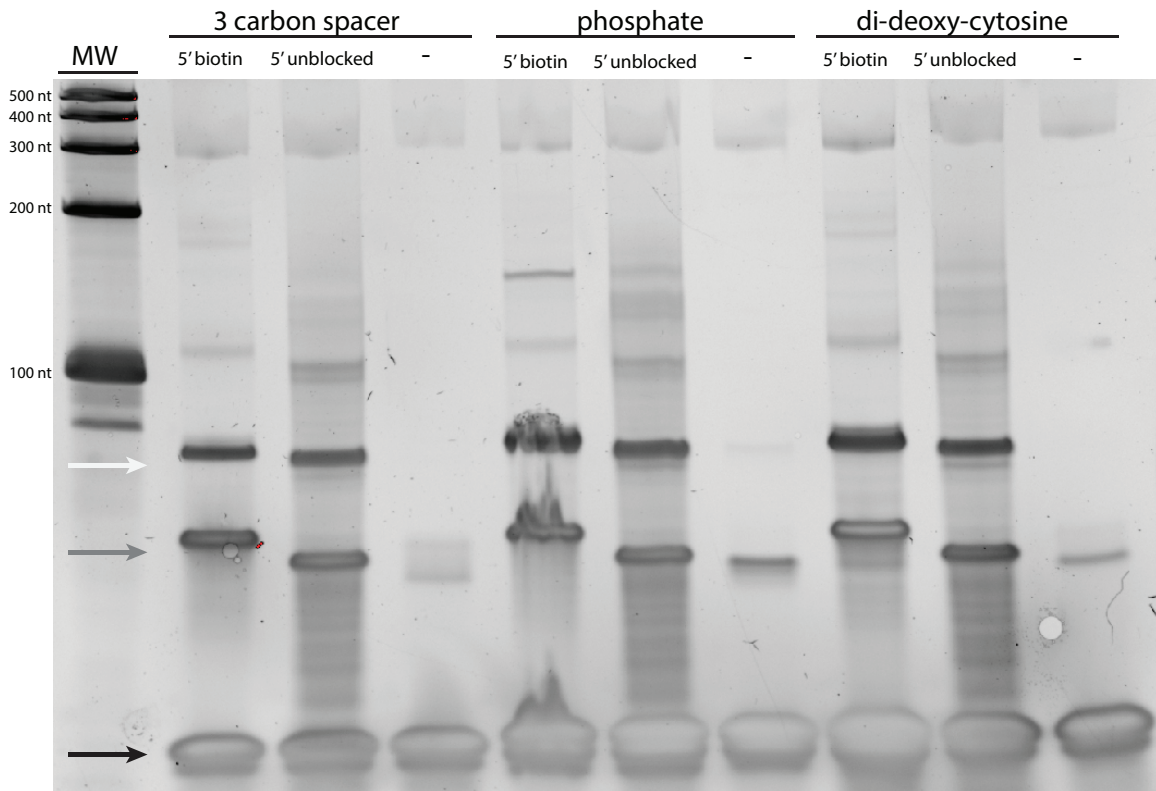

**Figure S10. Effect of 3' blocking group on second adapter concatemerization and ligation efficiency.** Three modifications (3 carbon spacer, phosphate, and di-deoxy-cytosine) were added to the 3' end of the adapter (black arrow), which was then ligated (60 °C for 2 hours with Circligase I) to an RT primer (gray arrow) that was either 5' blocked (57 nt) with biotin or unblocked (54 nt). A third control lane for each 3' modification consisting of the ligation of the adapter without RT primer is shown (-). Regardless of 3' modification, some adapter form concatemers during the ligation, with concatemers showing up at 50 nt, near the size of the RT primers (gray arrow). However, this effect is the weakest for the 3 carbon spacer modification, which also shows the least amount of adapter concatemer ligated to the RT primer, seen as bands longer than the expected ligated product which is 79 nt or 82 nt (white arrow). While no modification stood out as the clear best, the 3' 3-carbon spacer modification was chosen for its relative cleanliness and lower cost than di-deoxy-cytosine.

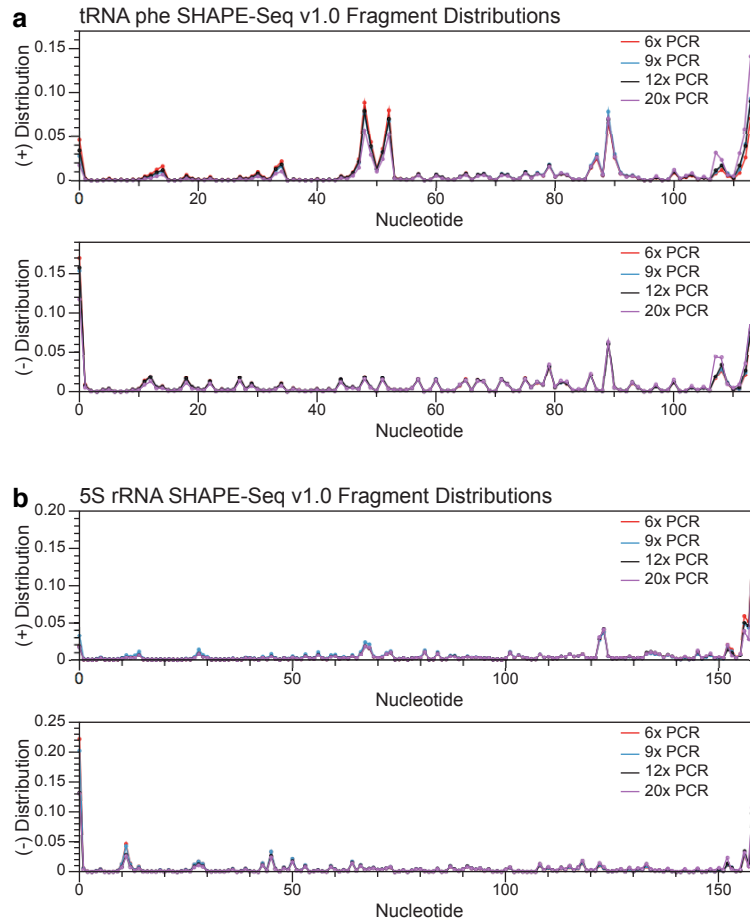

**Figure S11. SHAPE-Seq v1.0 fragment distributions for different numbers of PCR cycles.** (+) and (-) fragment distributions are plotted for SHAPE-Seq v1.0 with varying numbers of PCR cycles for (a) tRNA<sup>phe</sup> and (b) 5S rRNA (see Figure 4). Pearson correlation values for specific comparisons are shown in Figure 3.

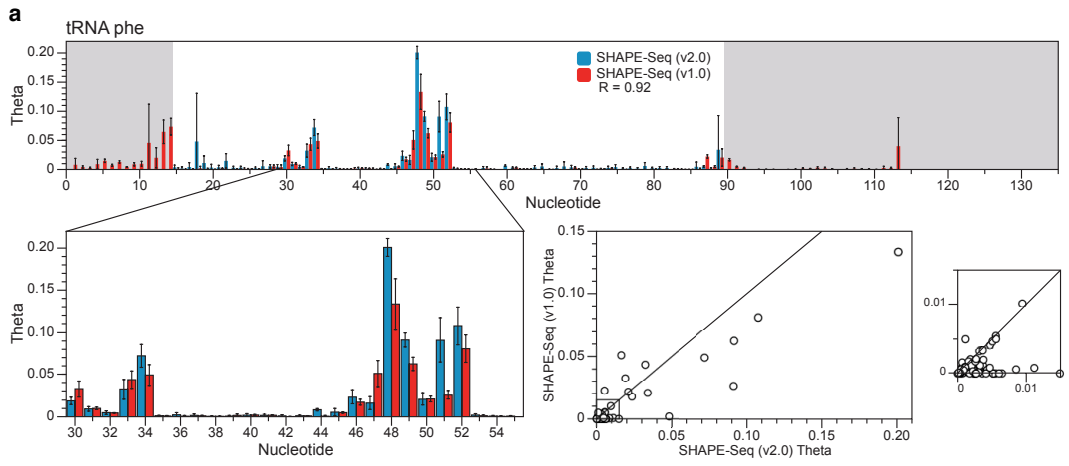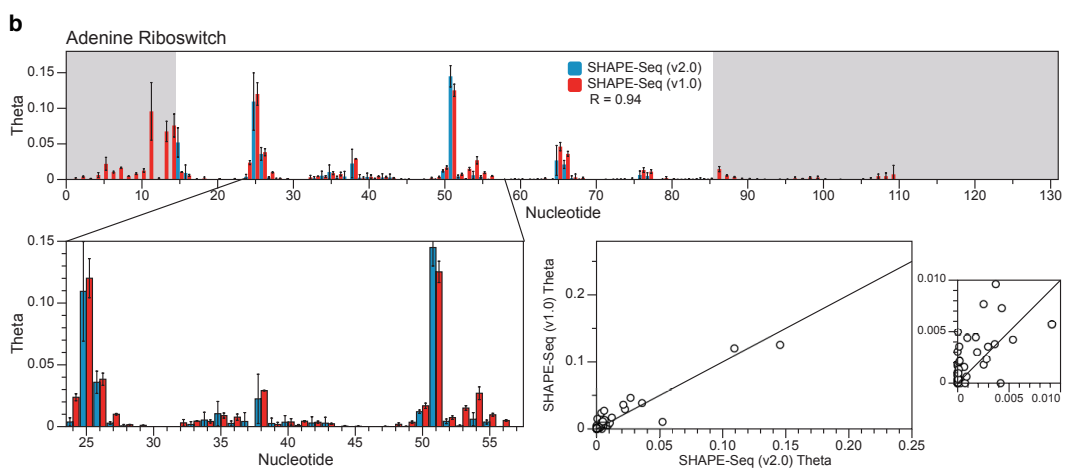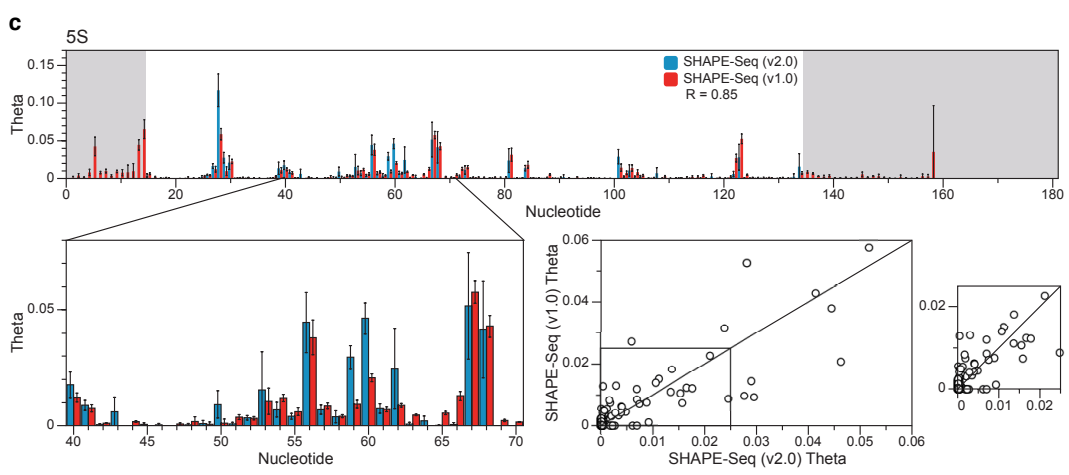

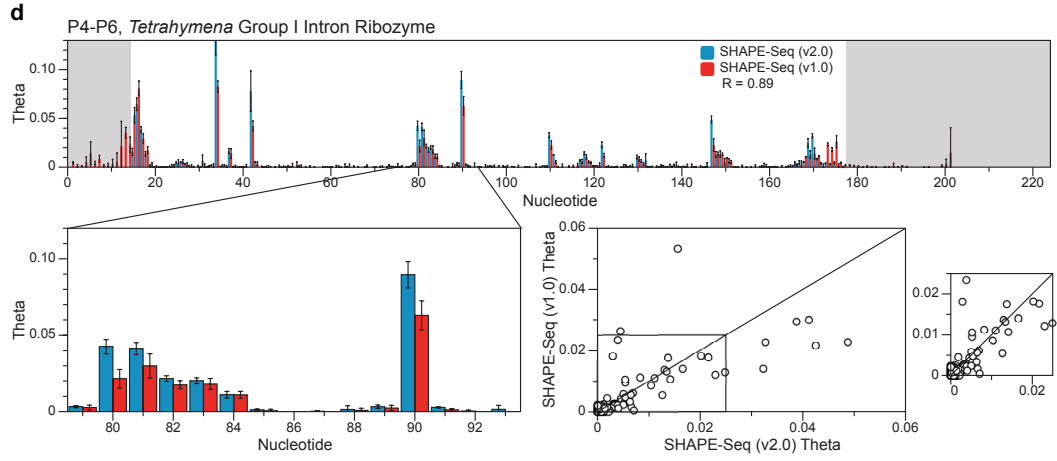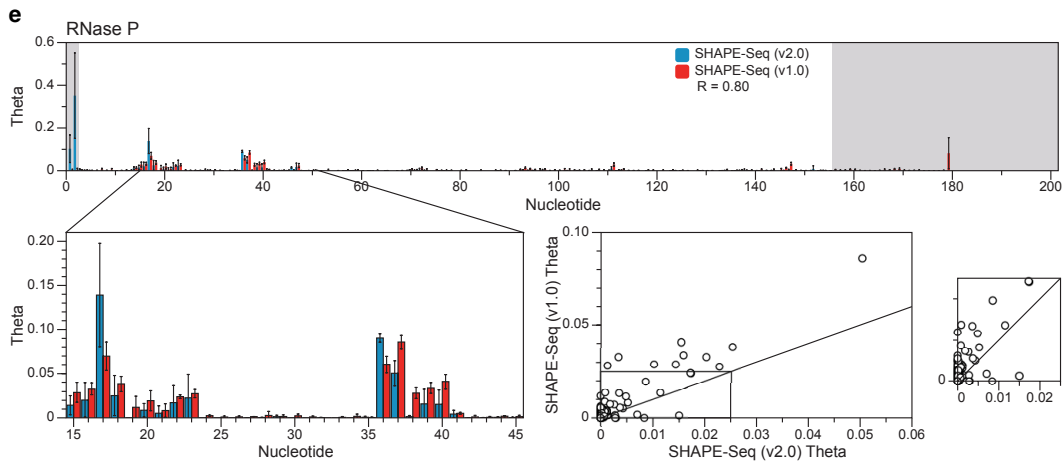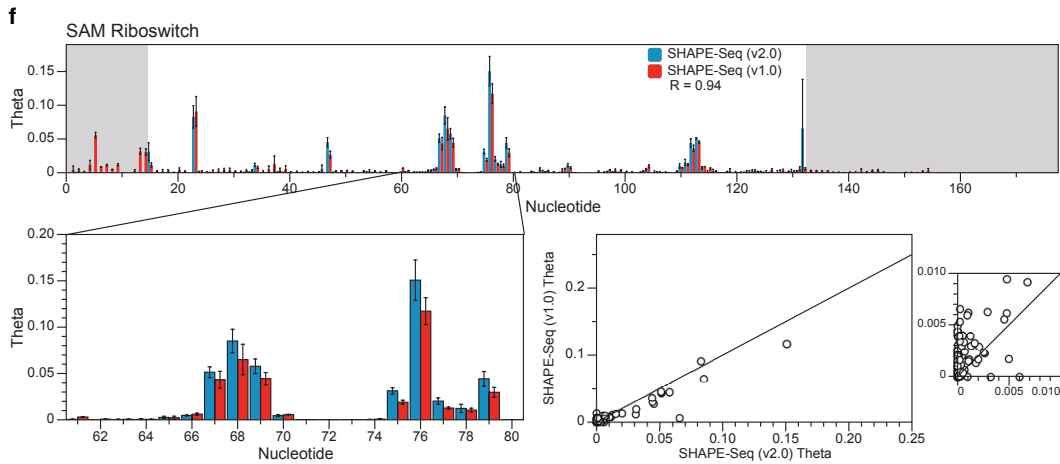

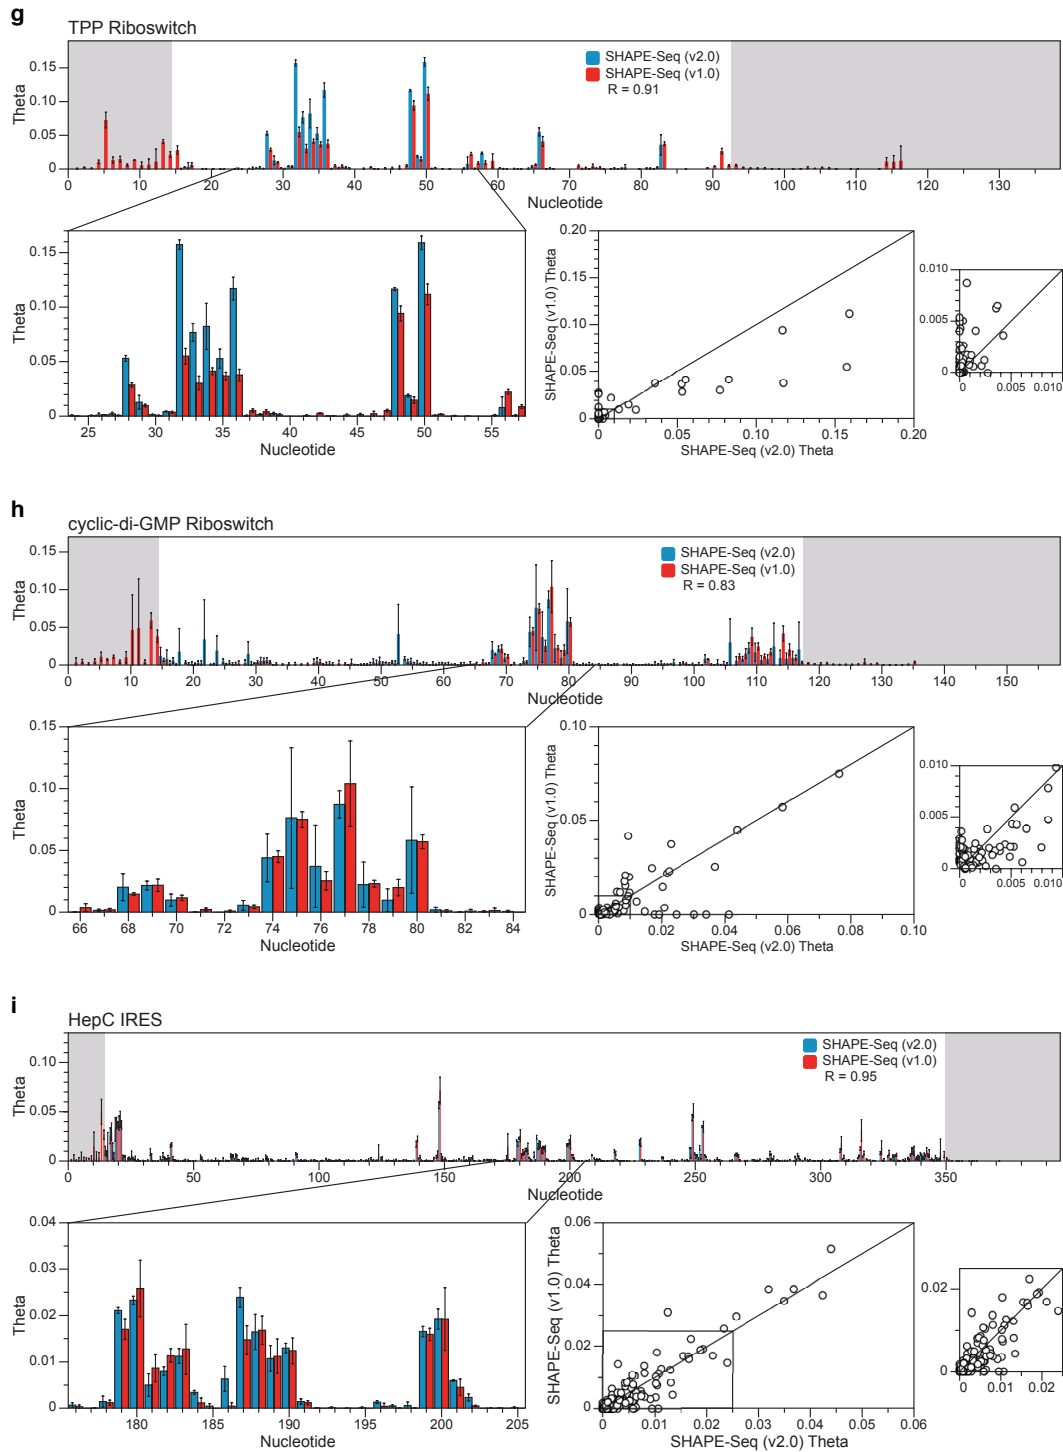

**Figure S12. SHAPE-Seq v2.0 vs. SHAPE-Seq v1.0.** For each RNA, SHAPE-Seq v2.0 (blue) and SHAPE-Seq v1.0 (red)  $\theta$ 's are plotted on top, with a zoomed window on portions of the comparison shown on the bottom left. Error bars are calculated as standard deviations of reactivities at each nucleotide from three independent replicate experiments. The bottom right shows SHAPE-Seq v2.0 vs. v1.0  $\theta$ 's plotted as a scatter plot, from which the Pearson's

correlation (R) between the two techniques is calculated. Gray boxes represent flanking structure cassette regions included in the RNAs for SHAPE-Seq v1.0, but not present in the RNAs for SHAPE-Seq v2.0 (see Table S1).

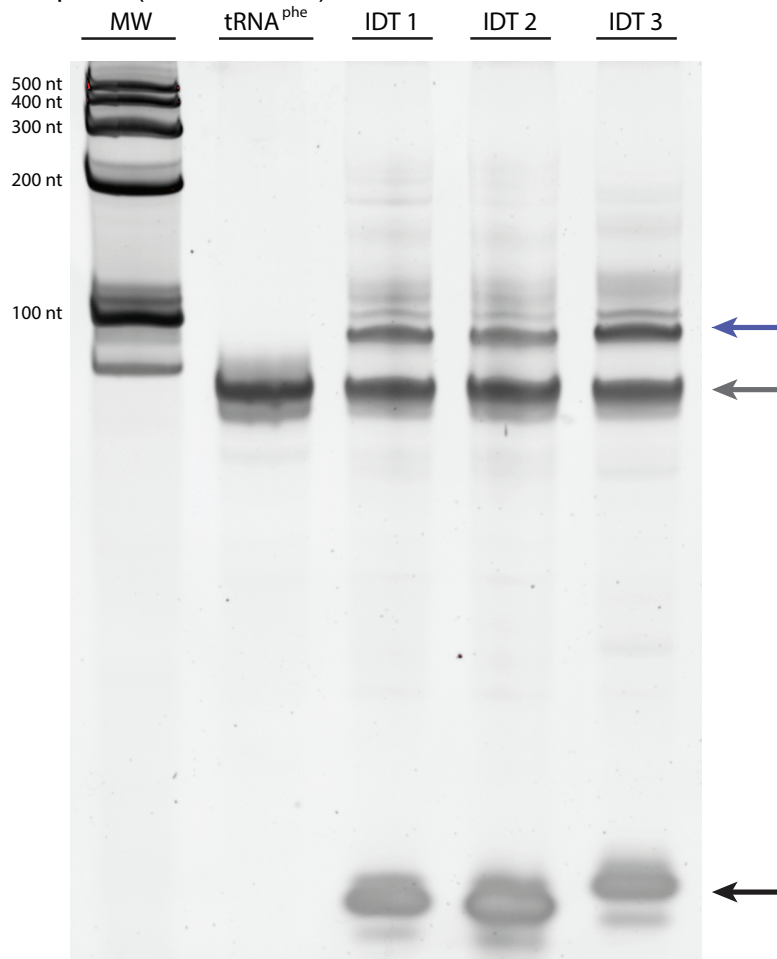

**Figure S13. Choice of 5' adenylated linker sequence for SHAPE-Seq v2.0 universal priming strategy.** Each linker choice was ligated onto an unmodified strand of tRNA<sup>phe</sup> using T4 RNA Ligase 2, truncated KQ overnight at room temperature. The gray arrow indicates the bands that correspond to the full-length, unligated tRNA, the blue arrow above shows the bands corresponding to the successfully ligated tRNA+linker, and the bands at the very bottom of the figure correspond to unligated linker. IDT1, IDT2 and IDT3 sequences are commercially available from Integrated DNA Technologies, Inc. at: <http://www.idtdna.com/pages/products/mirna/mirna-cloning-products>. IDT2 was chosen due to it having the highest melting temperature with its RT primer (Figure S4).

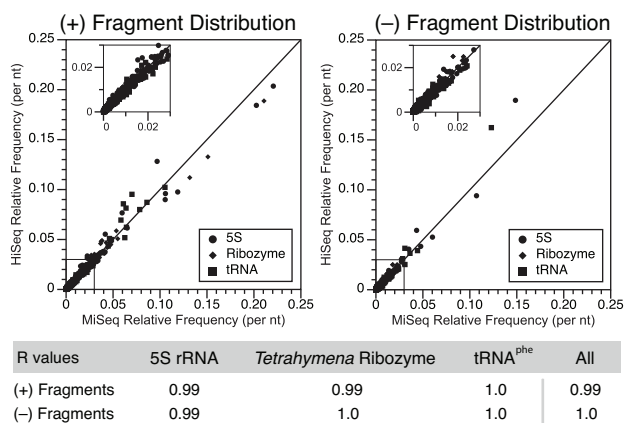

**Figure S14. SHAPE-Seq v2.0 reactivities generated from the MiSeq and HiSeq platforms.** (+) and (-) fragment distributions for each RNA were compared between sequencing platforms as in Figure 2. Pearson correlation values for individual comparisons between fragment distributions, are shown on the bottom.

**Table S4.** RNA structure prediction accuracy using the RNAstructure (6) *fold* algorithm with no SHAPE-Seq constraints.

| RNA                                               | Sensitivity   | PPV           |
|---------------------------------------------------|---------------|---------------|
| 5S rRNA                                           | 10/35=28.6%   | 10/40=25.0%   |
| Adenine Riboswitch                                | 21/21=100%    | 21/21=100%    |
| Cyclic di-GMP riboswitch                          | 21/28=75.0%   | 21/27=77.8%   |
| P4-P6, <i>Tetrahymena</i> group I intron ribozyme | 46/48=95.8%   | 47/55=85.5%   |
| RNAse P                                           | 23/42=54.8%   | 23/46=50.0%   |
| tRNA <sup>phe</sup>                               | 20/21= 95.2%  | 20/20=100%    |
| Hepatitis C IRES                                  | 41/104=39.4%  | 41/108=38.0%  |
| SAM I riboswitch                                  | 29/39=74.4%   | 29/36=80.6%   |
| TPP riboswitch                                    | 17/22=77.3%   | 17/20=85.0%   |
| Total                                             | 228/360=63.3% | 229/373=61.4% |

**Table S5.** RNA structure prediction accuracy using SHAPE-Seq v2.0 reactivity data ( $\rho$ 's) as constraints in the RNAstructure (6) *fold* algorithm with  $m = 1.8$  and  $b = -0.6$ .

| RNA                                               | Sensitivity   | PPV           |
|---------------------------------------------------|---------------|---------------|
| 5S rRNA                                           | 34/35=97.1%   | 34/37=91.9%   |
| Adenine Riboswitch                                | 21/21=100%    | 21/21=100%    |
| Cyclic di-GMP riboswitch                          | 19/28=67.9%   | 19/24=79.2%   |
| P4-P6, <i>Tetrahymena</i> group I intron ribozyme | 45/48=93.8%   | 46/51=90.2%   |
| RNAse P                                           | 22/42=52.4%   | 22/44=50.0%   |
| tRNA <sup>phe</sup>                               | 21/21= 100%   | 21/21=100%    |
| Hepatitis C IRES                                  | 81/104=77.9%  | 81/96=84.4%   |
| SAM I riboswitch                                  | 32/39=82.1%   | 32/37=86.5%   |
| TPP riboswitch                                    | 17/22=77.3%   | 17/20=85.0%   |
| Total                                             | 292/360=81.1% | 293/351=83.5% |

**Table S6.** RNA structure prediction accuracy using SHAPE-Seq v2.0 reactivity data ( $\rho$ 's) as constraints in the RNAstructure (6) *fold* algorithm with  $m = 1.1$  and  $b = -0.3$ .

| RNA                                               | Sensitivity   | PPV           |
|---------------------------------------------------|---------------|---------------|
| 5S rRNA                                           | 34/35=97.1%   | 34/37=91.9%   |
| Adenine Riboswitch                                | 21/21=100%    | 21/21=100%    |
| Cyclic di-GMP riboswitch                          | 21/28=75.0%   | 21/28=75.0%   |
| P4-P6, <i>Tetrahymena</i> group I intron ribozyme | 44/48=91.7%   | 45/49=91.8%   |
| RNAse P                                           | 33/42=78.6%   | 33/40=82.5%   |
| tRNA <sup>phe</sup>                               | 20/21= 95.2%  | 20/20=100%    |
| Hepatitis C IRES                                  | 81/104=77.9%  | 81/90=90.0%   |
| SAM I riboswitch                                  | 32/39=82.1%   | 32/37=86.5%   |
| TPP riboswitch                                    | 17/22=77.3%   | 17/20=85.0%   |
| Total                                             | 303/360=84.2% | 304/342=88.9% |



**Table S7.** Data deposition table. SHAPE-Seq reactivity spectra generated in this work are freely available from the RNA Mapping Database (RMDB) (7) (<http://rmdb.stanford.edu/repository/>), accessible using the RMDB ID numbers indicated below.

| Name                                                 | Library Type                             | RMDB ID                                                 | Figure                                                  |
|------------------------------------------------------|------------------------------------------|---------------------------------------------------------|---------------------------------------------------------|
| 5S rRNA, <i>E. coli</i>                              | SHAPE-Seq v1.0                           | 5SSC_1M7_0001                                           | Figure 2,<br>SI Figure 5,                               |
| 5S rRNA, <i>E. coli</i>                              | SHAPE-Seq v1.0 Minimal                   | 5SSC_1M7_0002                                           | Figure 2                                                |
| 5S rRNA, <i>E. coli</i>                              | SHAPE-Seq v1.0 Inverted                  | 5SSC_1M7_0003                                           | Figure 2                                                |
| 5S rRNA, <i>E. coli</i>                              | SHAPE-Seq v1.0 Indexed<br>Replicates 1-3 | 5SSC_1M7_0004<br>5SSC_1M7_0005,<br>5SSC_1M7_0006        | Figure 3,<br>Figure 5,<br>SI Figure 11,<br>SI Figure 12 |
| 5S rRNA, <i>E. coli</i>                              | SHAPE-Seq v2.0 Indexed<br>Replicates 1-3 | 5SRRNA_1M7_0001,<br>5SRRNA_1M7_0002,<br>5SRRNA_1M7_0003 | Figure 5,<br>SI Figure 12,<br>SI Figure 14              |
| Adenine riboswitch, <i>V. vulnificus</i>             | SHAPE-Seq v1.0                           | ADDSC_1M7_0001                                          | Figure 2,<br>SI Figure 5,                               |
| Adenine riboswitch, <i>V. vulnificus</i>             | SHAPE-Seq v1.0 Minimal                   | ADDSC_1M7_0002                                          | Figure 2                                                |
| Adenine riboswitch, <i>V. vulnificus</i>             | SHAPE-Seq v1.0 Inverted                  | ADDSC_1M7_0003                                          | Figure 2                                                |
| Adenine riboswitch, <i>V. vulnificus</i>             | SHAPE-Seq v1.0 Indexed<br>Replicates 1-3 | ADDSC_1M7_0004<br>ADDSC_1M7_0005,<br>ADDSC_1M7_0006     | Figure 5,<br>SI Figure 12                               |
| Adenine riboswitch, <i>V. vulnificus</i>             | SHAPE-Seq v2.0 Indexed<br>Replicates 1-3 | ADDRSW_1M7_0001,<br>ADDRSW_1M7_0002,<br>ADDRSW_1M7_0003 | Figure 5,<br>SI Figure 12                               |
| Cyclic di-GMP riboswitch, <i>V. cholerae</i>         | SHAPE-Seq v1.0 Indexed<br>Replicates 1-3 | GMPSC_1M7_0001<br>GMPSC_1M7_0002,<br>GMPSC_1M7_0003     | Figure 5,<br>SI Figure 12                               |
| Cyclic di-GMP riboswitch, <i>V. cholerae</i>         | SHAPE-Seq v2.0 Indexed<br>Replicates 1-3 | CIDGMP_1M7_0001,<br>CIDGMP_1M7_0002,<br>CIDGMP_1M7_0003 | Figure 5,<br>SI Figure 12                               |
| P4-P6, <i>Tetrahymena</i> group I<br>intron ribozyme | SHAPE-Seq v1.0                           | TRIBSC_1M7_0001                                         | Figure 2,<br>SI Figure 5,                               |
| P4-P6, <i>Tetrahymena</i> group I<br>intron ribozyme | SHAPE-Seq v1.0 Minimal                   | TRIBSC_1M7_0002                                         | Figure 2                                                |
| P4-P6, <i>Tetrahymena</i> group I<br>intron ribozyme | SHAPE-Seq v1.0 Inverted                  | TRIBSC_1M7_0003                                         | Figure 2                                                |
| P4-P6, <i>Tetrahymena</i> group I<br>intron ribozyme | SHAPE-Seq v1.0 Indexed<br>Replicates 1-3 | TRIBSC_1M7_0004<br>TRIBSC_1M7_0005,<br>TRIBSC_1M7_0006  | Figure 5,<br>SI Figure 12                               |
| P4-P6, <i>Tetrahymena</i> group I<br>intron ribozyme | SHAPE-Seq v2.0 Indexed<br>Replicates 1-3 | TRP4P6_1M7_0001,<br>TRP4P6_1M7_0002,<br>TRP4P6_1M7_0003 | Figure 5,<br>SI Figure 12,<br>SI Figure 14              |
| RNAse P, specificity domain, <i>B. subtilis</i>      | SHAPE-Seq v1.0                           | RNPSC_1M7_0001                                          | Figure 2,<br>SI Figure 5,<br>SI Figure 6                |
| RNAse P, specificity domain, <i>B. subtilis</i>      | SHAPE-Seq v1.0 Minimal                   | RNPSC_1M7_0002                                          | Figure 2,<br>SI Figure 6                                |
| RNAse P, specificity domain, <i>B. subtilis</i>      | SHAPE-Seq v1.0 Inverted                  | RNPSC_1M7_0003                                          | Figure 2,<br>SI Figure 6                                |
| RNAse P, specificity domain, <i>B. subtilis</i>      | SHAPE-Seq v1.0 Indexed<br>Replicates 1-3 | RNPSC_1M7_0004<br>RNPSC_1M7_0005,<br>RNPSC_1M7_0006     | Figure 5,<br>SI Figure 12                               |

|                                                 |                                       |                                                   |                                                                |
|-------------------------------------------------|---------------------------------------|---------------------------------------------------|----------------------------------------------------------------|
| RNAse P, specificity domain, <i>B. subtilis</i> | SHAPE-Seq v2.0 Indexed Replicates 1-3 | RNASEP_1M7_0001, RNASEP_1M7_0002, RNASEP_1M7_0003 | Figure 5, SI Figure 12                                         |
| tRNA <sup>phe</sup> , <i>E. coli</i>            | SHAPE-Seq v1.0                        | TRNASC_1M7_0001                                   | Figure 2, SI Figure 5<br>SI Figure 6                           |
| tRNA <sup>phe</sup> , <i>E. coli</i>            | SHAPE-Seq v1.0 Minimal                | TRNASC_1M7_0002                                   | Figure 2, SI Figure 6                                          |
| tRNA <sup>phe</sup> , <i>E. coli</i>            | SHAPE-Seq v1.0 Inverted               | TRNASC_1M7_0003                                   | Figure 2, SI Figure 6                                          |
| tRNA <sup>phe</sup> , <i>E. coli</i>            | SHAPE-Seq v1.0 Indexed Replicates 1-3 | TRNASC_1M7_0004, TRNASC_1M7_0005, TRNASC_1M7_0006 | Figure 5, SI Figure 12                                         |
| tRNA <sup>phe</sup> , <i>E. coli</i>            | SHAPE-Seq v2.0 Indexed Replicates 1-3 | TRNAPH_1M7_0001, TRNAPH_1M7_0002, TRNAPH_1M7_0003 | Figure 3, Figure 5, SI Figure 11<br>SI Figure 12, SI Figure 14 |
| Hepatitis C virus IRES domain                   | SHAPE-Seq v1.0 Indexed Replicates 1-3 | HEPCSC_1M7_0001, HEPCSC_1M7_0002, HEPCSC_1M7_0003 | Figure 5, SI Figure 12                                         |
| Hepatitis C virus IRES domain                   | SHAPE-Seq v2.0 Indexed Replicates 1-3 | HCIRES_1M7_0001, HCIRES_1M7_0002, HCIRES_1M7_0003 | Figure 5, SI Figure 12                                         |
| SAM I riboswitch, <i>T. tencongensis</i>        | SHAPE-Seq v1.0 Indexed Replicates 1-3 | SAMSC_1M7_0001, SAMSC_1M7_0002, SAMSC_1M7_0003    | Figure 5, SI Figure 12                                         |
| SAM I riboswitch, <i>T. tencongensis</i>        | SHAPE-Seq v2.0 Indexed Replicates 1-3 | SAMRSW_1M7_0001, SAMRSW_1M7_0002, SAMRSW_1M7_0003 | Figure 5, SI Figure 12                                         |
| TPP riboswitch, <i>E. coli</i>                  | SHAPE-Seq v1.0 Indexed Replicates 1-3 | TPPSC_1M7_0001, TPPSC_1M7_0002, TPPSC_1M7_0003    | Figure 5, SI Figure 12                                         |
| TPP riboswitch, <i>E. coli</i>                  | SHAPE-Seq v2.0 Indexed Replicates 1-3 | TPPRSW_1M7_0001, TPPRSW_1M7_0002, TPPRSW_1M7_0003 | Figure 5, SI Figure 12                                         |

## References

- Merino, E.J., Wilkinson, K.A., Coughlan, J.L. and Weeks, K.M. (2005) RNA structure analysis at single nucleotide resolution by selective 2'-hydroxyl acylation and primer extension (SHAPE). *J. Am. Chem. Soc.*, **127**, 4223–4231.
- Lucks, J.B., Mortimer, S.A., Trapnell, C., Luo, S., Aviran, S., Schroth, G.P., Pachter, L., Doudna, J.A. and Arkin, A.P. (2011) Multiplexed RNA structure characterization with selective 2'-hydroxyl acylation analyzed by primer extension sequencing (SHAPE-Seq). *Proceedings of the National Academy of Sciences*, **108**, 11063–11068.
- Mortimer, S.A., Trapnell, C., Aviran, S., Pachter, L. and Lucks, J.B. (2012) SHAPE-Seq: High-Throughput RNA Structure Analysis. *Curr Protoc Chem Biol*, **4**, 275–297.
- Kladwang, W., VanLang, C.C., Cordero, P. and Das, R. (2011) Understanding the errors of SHAPE-directed RNA structure modeling. *Biochemistry*, **50**, 8049–8056.

5. Hajdin, C.E., Bellaousov, S., Huggins, W., Leonard, C.W., Mathews, D.H. and Weeks, K.M. (2013) Accurate SHAPE-directed RNA secondary structure modeling, including pseudoknots. *Proc. Natl. Acad. Sci. U.S.A.*, **110**, 5498–5503.
6. Reuter, J.S. and Mathews, D.H. (2010) RNAstructure: software for RNA secondary structure prediction and analysis. *BMC Bioinformatics*, **11**, 129.
7. Cordero, P., Lucks, J.B. and Das, R. (2012) An RNA Mapping DataBase for curating RNA structure mapping experiments. *Bioinformatics*, **28**, 3006–3008.
